# Supplementary material
Source: PubMed Central journal article supplement (PMC2635922)
Supplement: NIHMS66549-supplement.pdf [file NIHMS66549-supplement.pdf]

## Supporting Information

- S1. Computational cost of each step in binding free energy calculation.
- S2. Details of constructing 2-dimensional PMF.
- S3. The detailed decomposition of the total binding free energy into the contribution from each stage for the 25 SH2 domain-phosphopeptide pairs.
- S4. Structure database of peptide motifs that are known to bind SH2 domain.
- S5. Comparison of PMF graphs before and after introducing the second distance for Stat1 binding free energy calculations.
- S6. Comparison of sampling before and after introducing the second variable  $d_2$ , where  $d_1$  is the center-of-mass distance between the SH2 domain and peptide and  $d_2$  the distance between the phosphate group and phosphate binding residues.
- S7. Superposition of structures containing the same SH2 domain and different peptides.
- S8. Superposition of structures containing the same peptide motif and different SH2 domains.

## I. DETAILS OF 2-DIMENSIONAL PMF

We first calculated the 1-dimensional PMF as a function of the SH2 domain-phosphopeptide center-of-mass (COM) distance using 31 umbrella sampling windows. The distance between two neighboring windows is 1 Å and the entire umbrella sampling span from 10 to 40 Å. Because of the strong electrostatic interactions between the phosphate group and the negatively charged residues in the phosphate binding site, there is usually no adequate sampling for the regions where the peptide is about to leave the binding site, as shown in Figure 1(a). In order to sample these regions, the distance between the peptide phosphate group and residues in SH2 domain that are in direct contact with phosphate group is introduced as a second variable to construct a 2-dimensional PMF. Here the Stat1 SH2 domain bound with the native phosphopeptide pYDKP is given as an example to illustrate how the 2-D PMF is constructed. Specifically, the second reaction coordinate  $r_2$  is chosen to be the distance between the COM of the phosphate group PO4 and the COM of the sidechains of Lys7, Arg25, Ser27, Glu28 and Ser29, which have direct contact with the phosphate group of the phosphopeptide (Figure 1(b)). For each of the three windows with  $r_1$  distance 24, 25 and 26 Å, 15 umbrella windows were sampled with  $r_2$  distance spanning from 1 to 15 Å, as shown in Figure 3(b). Thus the total umbrella sampling has 73 windows and each lasts for 1 ns.

At the end of the simulation, a 2-dimensional PMF was calculated using the weighted histogram analysis methods (WHAM). By integrating the PMF along the  $r_2$  distance, we obtained the 1-dimensional PMF as a function of  $r_1$  distance, shown in Figure 2. The free energy change associated with translating the ligand into SH2 domain binding site was calculated from this 1-dimensional PMF. For comparison, the original 1-dimensional PMF constructed from 31 windows is also given.

$$e^{-\beta\mathcal{W}(r_1)} = \int e^{-\beta\mathcal{W}(r_2, r_1)} d(r_2) \quad (1)$$

TABLE I: Computational cost of each step in binding free energy calculation.

| Computation <sup>a</sup>   | Number of windows | Sampling per window (ns) | Rate <sup>b</sup> (hrs/ns) | CPU time (hrs) |
|----------------------------|-------------------|--------------------------|----------------------------|----------------|
| Equilibration              | 1                 | 1                        | 12                         | 144            |
| $\Delta G_c^{\text{bulk}}$ | 32                | 1                        | 1                          | 384            |
| $\Delta G_c^{\text{site}}$ | 32                | 1                        | 12                         | 4,608          |
| $\Delta G_a^{\text{site}}$ | 11                | 1                        | 12                         | 1,584          |
| $\Delta G_o^{\text{site}}$ | 11                | 1                        | 12                         | 1,584          |
| $\Delta G_a^{\text{bulk}}$ | 52                | 1                        | 12                         | 9,984          |
| Total per SH2-peptide      |                   |                          |                            | 18,288         |

<sup>a</sup>All computations are repeated three times with different initial conditions except for  $\Delta G_a^{\text{bulk}}$  term, which is repeated four times.

<sup>b</sup>Rate is based on running on four 2.2 GHz AMD Opteron 275 processors.

TABLE II: The detailed decomposition of the total binding free energy into the contribution from each stage for the 25 SH2 domain-phosphopeptide pairs (kcal/mol).

| SH2  | Peptide | $\Delta G_c^{\text{bulk}}$ | $\Delta G_o^{\text{bulk}}$ | $\Delta G_a^{\text{bulk},\circ}$ | $\Delta G_a^{\text{site}}$ | $\Delta G_o^{\text{site}}$ | $\Delta G_c^{\text{site}}$ | $\Delta G_{\text{total}}$ |
|------|---------|----------------------------|----------------------------|----------------------------------|----------------------------|----------------------------|----------------------------|---------------------------|
| Lck  | pYEEI   | 4.86±0.09                  | 5.55                       | -16.6±0.8                        | 0.35±0.03                  | 0.87±0.06                  | 1.70±0.13                  | -9.1±0.8                  |
|      | pYVNV   | 4.62±0.42                  | 5.66                       | -13.4±1.6                        | 0.18±0.01                  | 0.42±0.01                  | 0.80±0.10                  | -4.5±1.7                  |
|      | pYTPE   | 3.54±0.06                  | 5.62                       | -9.4±1.8                         | 0.22±0.01                  | 0.69±0.07                  | 0.53±0.02                  | -1.7±1.8                  |
|      | pYMDM   | 5.09±0.01                  | 5.64                       | -11.0±1.5                        | 0.37±0.06                  | 0.85±0.11                  | 0.84±0.13                  | -2.3±1.5                  |
|      | pYDKP   | 3.32±0.03                  | 5.87                       | -7.8±1.3                         | 0.84±0.04                  | 3.84±0.37                  | 3.25±0.14                  | -6.5±1.4                  |
|      | pY      | 1.60±0.04                  | 5.57                       | -7.5±1.5                         | 0.37±0.04                  | 1.84±0.09                  | 1.40±0.05                  | -3.9±1.5                  |
| Grb2 | pYEEI   | 2.76±0.05                  | 5.64                       | -8.1±1.7                         | 0.55±0.02                  | 1.77±0.15                  | 2.47±0.05                  | -4.5±1.7                  |
|      | pYVNV   | 4.41±0.18                  | 5.56                       | -19.4±1.7                        | 0.15±0.01                  | 0.42±0.01                  | 0.38±0.05                  | -10.4±1.7                 |
|      | pYTPE   | 2.40±0.04                  | 5.66                       | -7.7±0.6                         | 0.42±0.05                  | 1.46±0.17                  | 1.15±0.05                  | -2.7±0.6                  |
|      | pYMDM   | 3.07±0.06                  | 5.60                       | -10.5±2.0                        | 0.22±0.01                  | 1.14±0.24                  | 2.39±0.31                  | -5.6±2.0                  |
|      | pYDKP   | 6.67±0.22                  | 5.57                       | -17.1±1.2                        | 0.33±0.02                  | 0.53±0.02                  | 0.88±0.02                  | -6.6±1.2                  |

Continued on next page

TABLE II – continued from previous page

| SH2            | Peptide | $\Delta G_c^{\text{bulk}}$ | $\Delta G_o^{\text{bulk}}$ | $\Delta G_a^{\text{bulk},\circ}$ | $\Delta G_a^{\text{site}}$ | $\Delta G_o^{\text{site}}$ | $\Delta G_c^{\text{site}}$ | $\Delta G_{\text{total}}$ |
|----------------|---------|----------------------------|----------------------------|----------------------------------|----------------------------|----------------------------|----------------------------|---------------------------|
|                | pY      | 1.32±0.06                  | 6.05                       | -8.8±0.6                         | 0.99±0.06                  | 1.47±0.18                  | 0.27±0.01                  | -4.2±0.6                  |
| Cbl            | pYEEI   | 3.27±0.09                  | 5.56                       | -10.4±0.9                        | 0.31±0.03                  | 0.99±0.03                  | 1.24±0.04                  | -4.1±0.9                  |
|                | pYVNV   | 3.76±0.06                  | 5.56                       | -16.3±1.2                        | 0.21±0.02                  | 0.55±0.01                  | 0.56±0.15                  | -8.3±1.2                  |
|                | pYTPE   | 2.25±0.06                  | 5.57                       | -15.1±1.0                        | 0.31±0.07                  | 0.77±0.05                  | 0.81±0.13                  | -9.2±1.0                  |
|                | pYMDM   | 3.01±0.12                  | 5.56                       | -13.2±1.4                        | 0.46±0.06                  | 1.39±0.07                  | 1.42±0.04                  | -7.9±1.4                  |
|                | pYDKP   | 4.91±0.09                  | 5.65                       | -10.0±1.3                        | 0.65±0.21                  | 3.51±0.21                  | 3.59±0.52                  | -7.2±1.4                  |
|                | pY      | 1.41±0.04                  | 6.01                       | -9.2±1.6                         | 0.53±0.01                  | 1.62±0.12                  | 0.38±0.17                  | -4.3±1.6                  |
| p85 $\alpha$ N | pYEEI   | 3.31±0.02                  | 5.57                       | -11.8±1.1                        | 0.25±0.01                  | 0.57±0.09                  | 0.86±0.03                  | -4.6±1.1                  |
|                | pYVNV   | 4.37±0.26                  | 5.66                       | -18.9±1.9                        | 0.34±0.08                  | 0.33±0.02                  | 0.13±0.01                  | -9.7±1.9                  |
|                | pYTPE   | 5.95±0.37                  | 5.68                       | -12.0±1.3                        | 0.39±0.04                  | 1.26±0.21                  | 2.04±0.48                  | -4.1±1.4                  |
|                | pYMDM   | 2.84±0.08                  | 5.56                       | -11.3±0.7                        | 0.33±0.04                  | 0.91±0.19                  | 0.93±0.12                  | -5.1±0.7                  |
|                | pYDKP   | 2.94±0.18                  | 5.93                       | -9.6±1.3                         | 1.20±0.46                  | 2.26±0.32                  | 3.33±0.36                  | -7.5±1.5                  |
|                | pY      | 1.33±0.11                  | 6.07                       | -9.4±1.4                         | 0.49±0.01                  | 1.43±0.09                  | 0.67±0.04                  | -4.6±1.4                  |
| Stat1          | pYEEI   | 3.12±0.03                  | 5.56                       | -8.4±1.3                         | 0.77±0.11                  | 1.39±0.16                  | 1.54±0.06                  | -3.4±1.3                  |
|                | pYVNV   | 3.51±0.12                  | 5.57                       | -15.7±1.6                        | 1.20±0.03                  | 1.71±0.04                  | 0.70±0.05                  | -10.2±1.6                 |
|                | pYTPE   | 2.66±0.08                  | 5.61                       | -7.8±1.8                         | 0.50±0.02                  | 2.46±0.34                  | 1.48±0.05                  | -4.0±1.8                  |
|                | pYMDM   | 3.06±0.05                  | 5.55                       | -14.8±0.7                        | 0.62±0.06                  | 1.25±0.20                  | 1.67±0.12                  | -9.7±0.7                  |
|                | pYDKP   | 4.48±0.09                  | 5.61                       | -16.8±1.2                        | 0.67±0.04                  | 0.43±0.01                  | 0.52±0.04                  | -8.3±1.2                  |
|                | pY      | 1.22±0.11                  | 5.78                       | -9.3±0.3                         | 0.49±0.04                  | 1.57±0.07                  | 0.35±0.06                  | -4.7±0.3                  |

TABLE III: Structure database of peptide motifs that are known to bind SH2 domain.

|   | Ligand | PDB(resolution/Å)                                  |
|---|--------|----------------------------------------------------|
| 1 | pYADP  | 2FCI (NMR)                                         |
| 2 | pYANF  | 1P13 (1.63)                                        |
| 3 | pYAQP  | 1JU5 (NMR)                                         |
| 4 | pYAQV  | 1D4T (1.10), 1D4W (1.80), 1M27 (2.50), 1I3Z (2.15) |

Continued on next page

**TABLE III – continued from previous page**

---

| Ligand    | PDB(resolution/Å)                                                                          |
|-----------|--------------------------------------------------------------------------------------------|
| 5 pYDEV   | 2CIA (1.45), 2CI9 (1.50)                                                                   |
| 6 pYDKP   | 1YVL (3.00)                                                                                |
| 7 pYDVL   | 2OQ1 (1.90)                                                                                |
| 8 pYDYV   | 1X27 (2.70)                                                                                |
| 9 pYEEG   | 1LKL (1.80)                                                                                |
| 10 pYEEI  | 1LKK (1.00), 1KC2 (2.10), 1SHD (2.00), 2C0I (2.30),<br>1SPS (2.70), 1HCS (NMR), 1AOT (NMR) |
| 11 pYEEV  | 1CWD (2.25)                                                                                |
| 12 pYELL  | 2HDX (2.35)                                                                                |
| 13 pYENL  | 1R1S (1.90)                                                                                |
| 14 pYEPI  | 1A81 (3.00)                                                                                |
| 15 pYEPL  | 1UUR (2.70), 1UUS (2.80)                                                                   |
| 16 pYEPP  | 2ETZ (NMR)                                                                                 |
| 17 pYEpYI | 1NZL (1.90)                                                                                |
| 18 pYESP  | 2FCI (NMR)                                                                                 |
| 19 pYETD  | 1RQQ (2.60)                                                                                |
| 20 pYETL  | 2CSZ (NMR)                                                                                 |
| 21 pYIIP  | 2PLD (NMR)                                                                                 |
| 22 pYIKT  | 1BF5 (2.90)                                                                                |
| 23 pYINQ  | 1ZFP (1.80)                                                                                |
| 24 pYIpYV | 1NZV (2.10)                                                                                |
| 25 pYLDI  | 1FU5 (NMR)                                                                                 |
| 26 pYLKT  | 1BG1 (2.25)                                                                                |
| 27 pYLRV  | 1SHB (2.00)                                                                                |
| 28 pYMDM  | 2IUH (2.00), 1AYC (2.30)                                                                   |
| 29 pYMPP  | 1FU5 (NMR)                                                                                 |
| 30 pYNEL  | 2OQ1 (1.90)                                                                                |
| 31 pYpYN  | 1JYQ (2.00)                                                                                |

---

Continued on next page

**TABLE III – continued from previous page**

---

| Ligand   | PDB(resolution/Å)                                                                          |
|----------|--------------------------------------------------------------------------------------------|
| 32 pYQGL | 1TCE (NMR)                                                                                 |
| 33 pYQPG | 1FMK (1.50)                                                                                |
| 34 pYQPQ | 1LCK (2.50)                                                                                |
| 35 pYSFY | 1YVH (2.05)                                                                                |
| 36 pYSGL | 1A81 (3.00)                                                                                |
| 37 pYSTV | 2HMH (2.00), 2BBU (NMR)                                                                    |
| 38 pYTAV | 1AYA (2.05)                                                                                |
| 39 pYTPE | 2CBL (2.10), 1FBV (2.90)                                                                   |
| 40 pYVNI | 1AYB (3.00)                                                                                |
| 41 pYVNQ | 1MW4 (NMR)                                                                                 |
| 42 pYVNV | 1JYR (1.55), 1R1P (1.80), 1R1Q (1.80), 1BMB (1.80)<br>1TZE (2.10), 1FYR (2.40), 1QG1 (NMR) |
| 43 pYVPM | 1SHA (1.50), 1H9O (1.79), 2IUI (2.40), 1OO4 (NMR),<br>1PIC (NMR)                           |

---

---

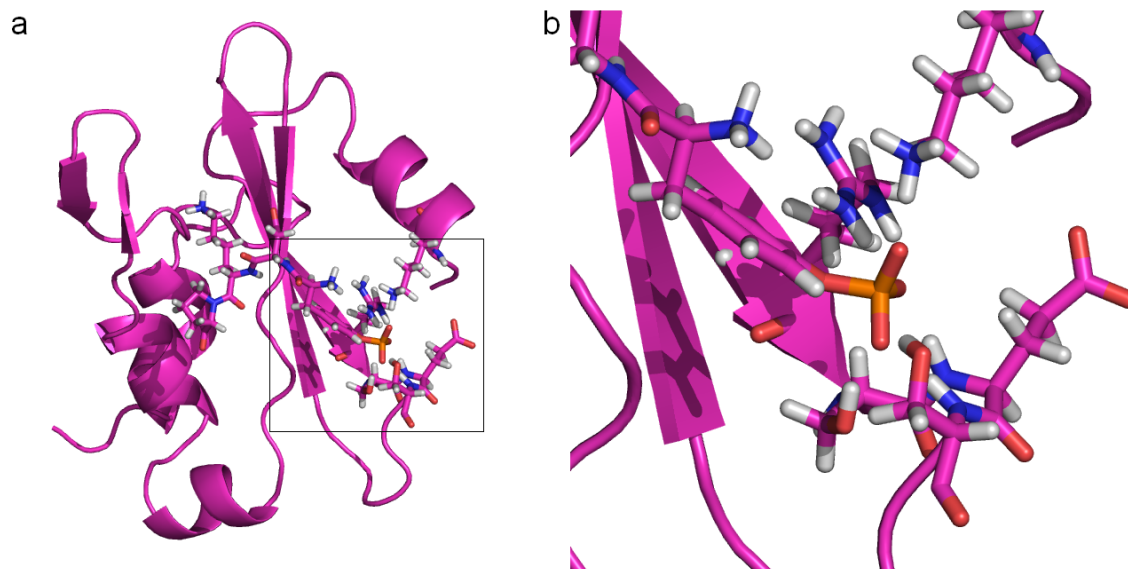

FIG. 1: a. Stat1 SH2 domain bound with a short phosphopeptide pYDKP. b. The phosphate group of the peptide has strong interaction with residue Lys7, Arg25, Ser27, Glu28 and Ser29.

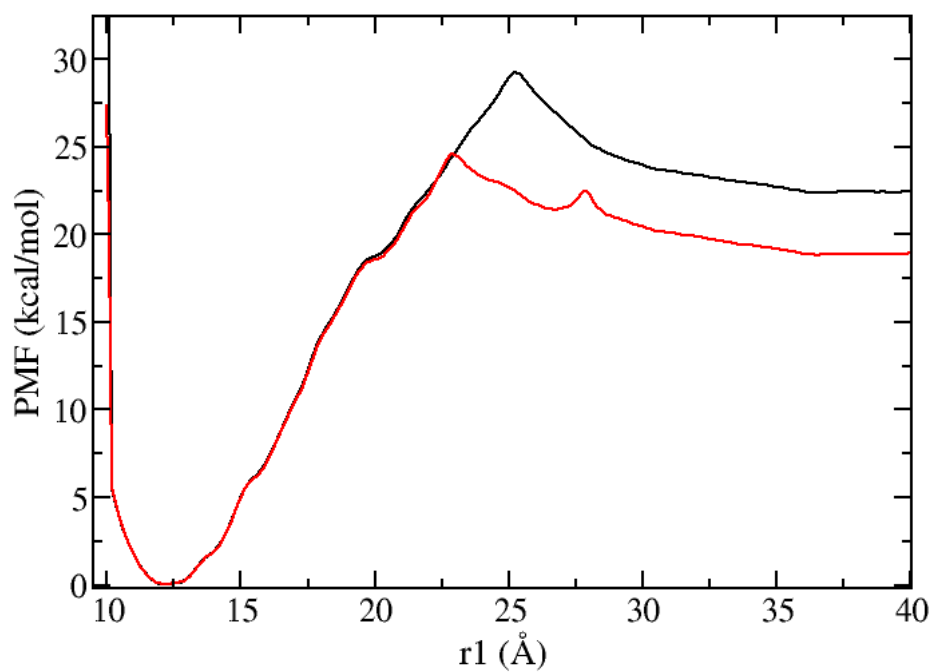

FIG. 2: Comparison of PMF graphs before and after introducing the second distance for Stat1 binding free energy calculations.

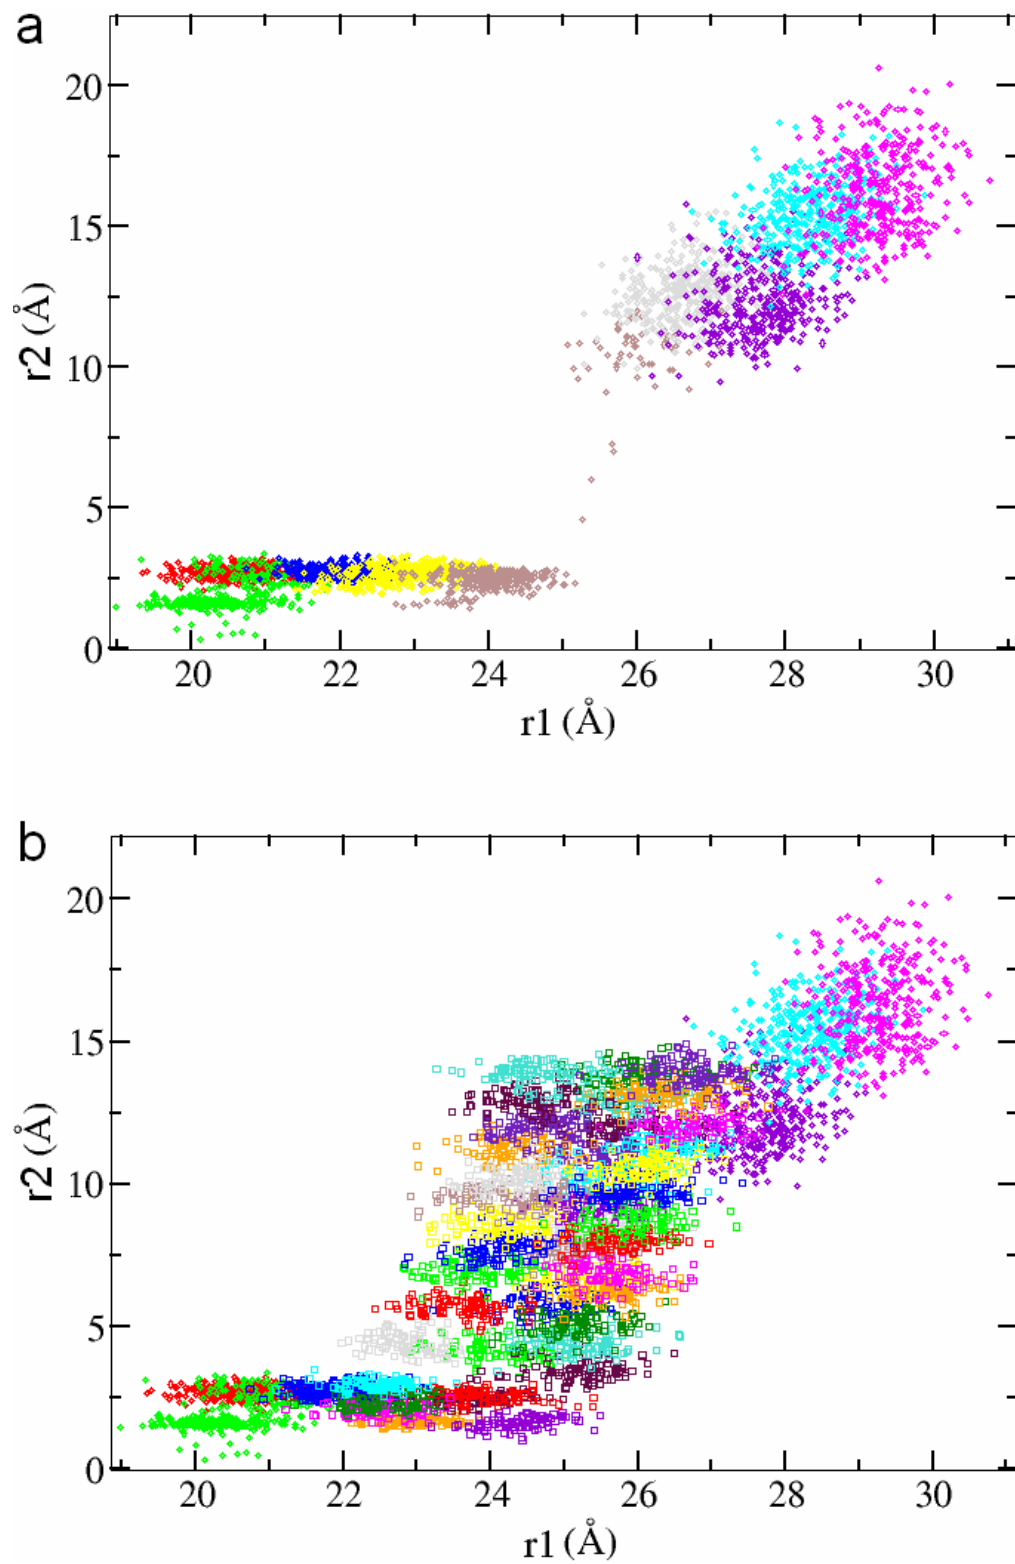

FIG. 3: Comparison of sampling before and after introducing the second variable  $r_2$ , where  $r_1$  is the COM distance between the SH2 domain and peptide and  $r_2$  the distance between the phosphate group and phosphate binding residues.



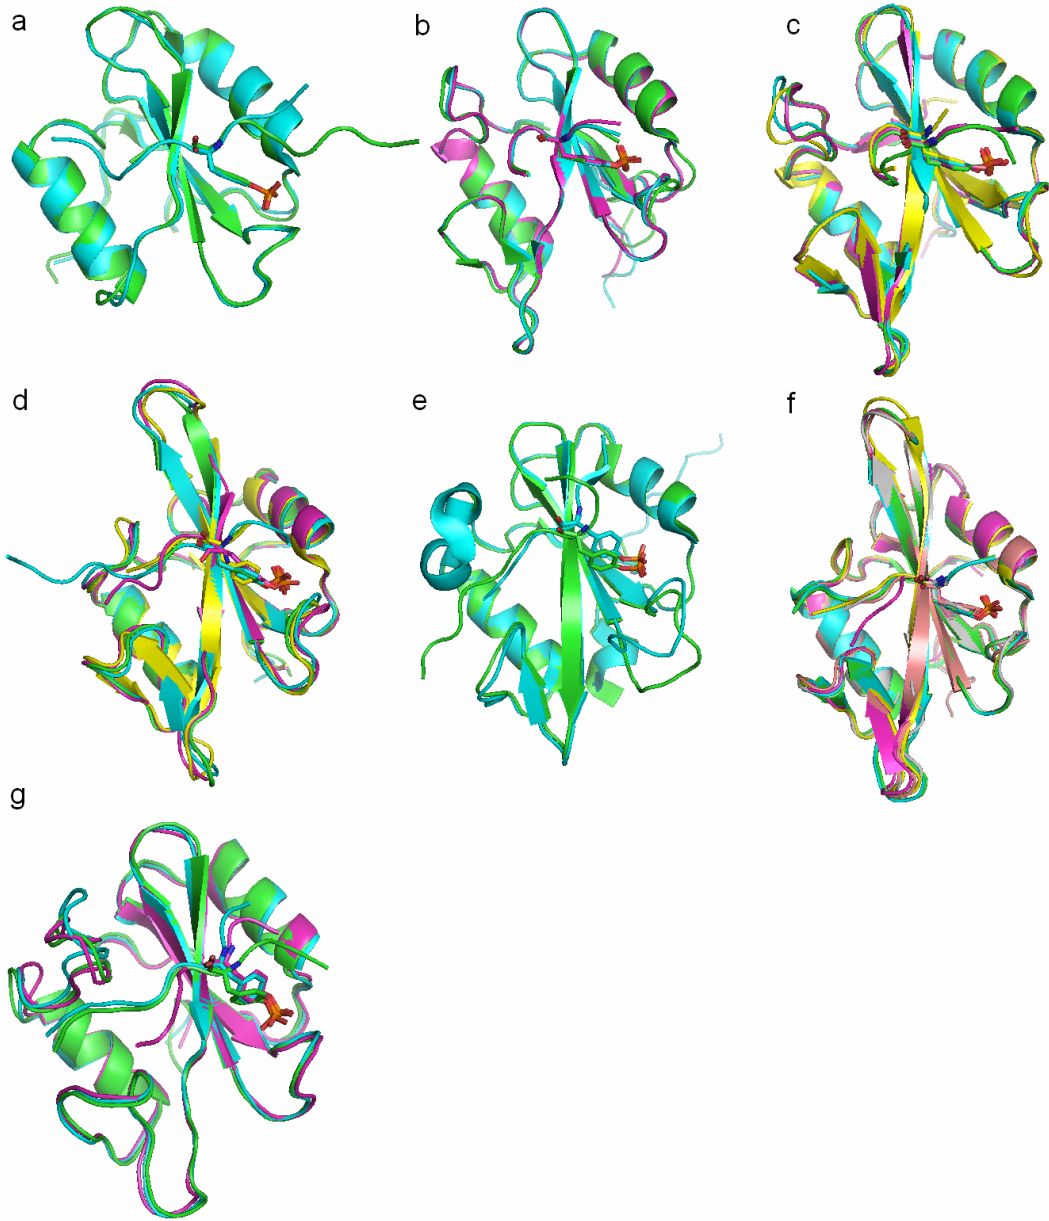

FIG. 4: Superposition of structures containing the same SH2 domain and different peptides. a. Cbl SH2 domain bound with SDGpYTPEPA and RAVENQpYSFY (PDB: 1FBV, 1YVH); b. Gads SH2 domain bound with DDpYVNV, AcREpYVNV and PDpYENL (PDB: 1R1P, 1R1Q, 1R1S); c. Grb2 SH2 domain bound with PSpYVNV, pYNpY, KPFPYVNV and EpYINQ (PDB: 1JYR, 1JYQ, 1TZE, 1ZFP); d. Lck SH2 domain bound with AcpYEEG, AcpYEEI, pYQPQ and DpYDYV (PDB: 1LKL, 1LCJ, 1LCK, 1X27); e. p85 $\alpha$ N SH2 domain bound with SVDpYVPMLD and TNEpYMDMKP (PDB: 2IUI, 2IUH); f. Src SH2 domain bound with PQpYIpYVPA, PQpYEpYIPA, pYVPML, pYL RVA and AcpYEEI (PDB: 1NZV, 1NZL, 1SHA, 1SHB, 1SHD); g. Syp SH2 domain bound with SVLpYTAVQPNE, SPQEpYVNIEF and DGGpYMDMSKDE (PDB: 1AYA, 1AYB, 1AYC). The colors for different ligands are sequentially green, cyan, magenta, yellow, salmon.

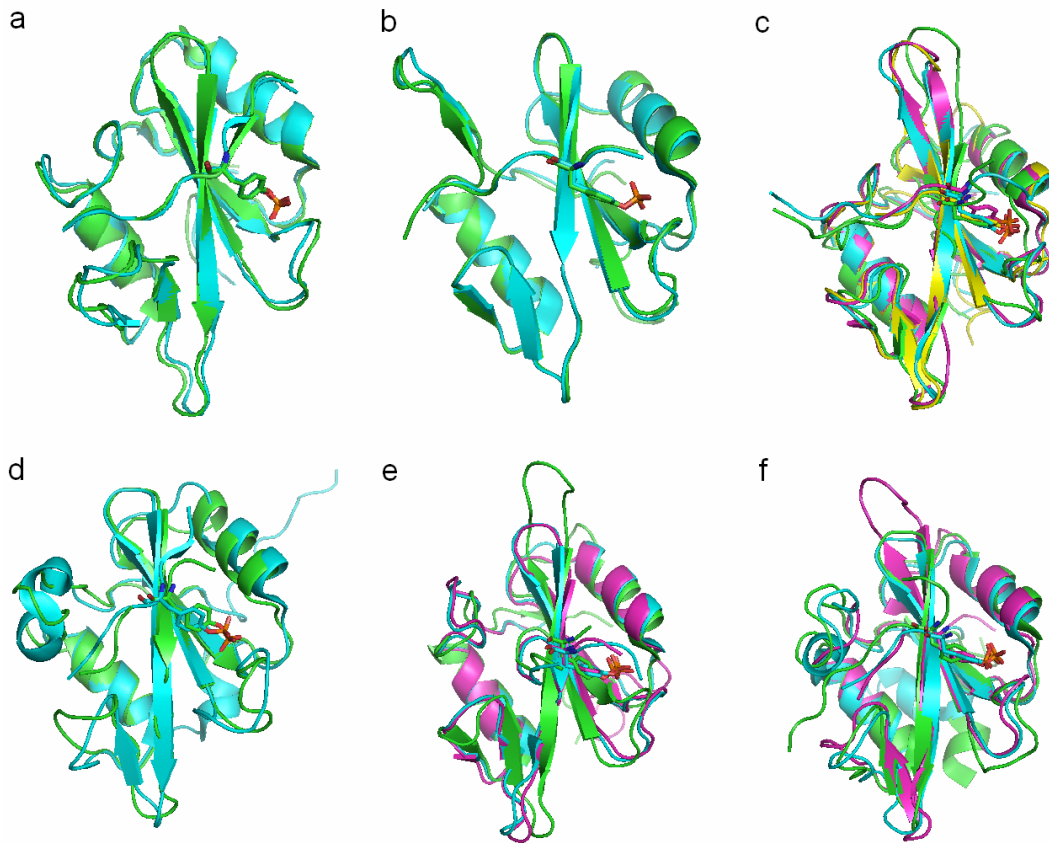

FIG. 5: Superposition of structures containing the same peptide motif and different SH2 domains. a. pYAQV bound with SAP SH2 and EAT2 SH2 (PDB: 1D4W, 1I3Z); b. pYDEV bound with Nck2 SH2 and Nck1 SH2 (PDB: 2CIA, 2CI9); c. pYEEI bound with Fyn SH2, Src SH2, Hck SH2 and Lck SH2 (PDB: 1AOT, 1SHD, 2C0I, 1LCJ); d. pYMMD bound with Syp SH2 and p85 $\alpha$ N SH2 (PDB: 1AYC, 2IUH) e. pYVNV bound with Src SH2, Grb2 SH2 and Gads SH2 (PDB: 1F1W, 1JYR, 1R1P); f. pYVPM bound with p85 $\alpha$ N SH2, p85 $\alpha$ C SH2 and Src SH2 (PDB: 2IUI, 1H9O, 1SHA); The colors for different SH2 domains are sequentially green, cyan, magenta yellow.
